# Supplementary material for: Determinants of Prakriti, the Human Constitution Types of Indian Traditional Medicine and its Correlation with Contemporary Science
Source: PubMed Central journal article supplement — J Ayurveda Integr Med. 2014 Jul-Sep;5(3):167–75. doi: 10.4103/0975-9476.140478 (PMC4204287; doi:10.4103/0975-9476.140478), 2014
Supplement: JAIM-5-167_S1.pdf [file JAIM-5-167_S1.pdf]

## SUPPLEMENTARY FILE 1

**Table S1: Different attributes of prakritis as per ayurvedic text**

| <i>Vata</i>                                                      | <i>Pitta</i>                                                 | <i>Kapha</i>                                                                   |                         |
|------------------------------------------------------------------|--------------------------------------------------------------|--------------------------------------------------------------------------------|-------------------------|
| <i>Darsana</i> (visual features)                                 |                                                              |                                                                                |                         |
| Apachita (Emaciation)                                            | Peeta anga (Yellow-tinged skin)                              | Upachita (Plump)                                                               |                         |
| Alpa sareera (small stature)                                     | Sukumara gatra (Delicate body)                               | Paripurna sarvanga (well built)                                                |                         |
| Sputita anga avayava (Cracked skin)                              | Avadata gatra (Clear skin)                                   | Drusti sukha gatra (Pleasing Appearance)                                       |                         |
| Pratata-sheetata udvepaka (High tendency of cold and shivering)  | Kshipra vali (Early wrinkling)                               | Sukumara gatra (Delicate body)                                                 |                         |
| Pratata-sheetata sthambaka (High tendency of cold and stiffness) | Kshipra vali (Early wrinkling)                               | Avadata gatra (Clear skin)                                                     |                         |
| Kandara sira pratana (Prominent tendons and veins)               | Prabhoota pipplu (Excessive red skin marks-port wine stains) | Prasanna darshana (Cheerful disposition)                                       |                         |
|                                                                  | Prabhoota vyanga (Excessive Freckles)                        | Prasanna aanana (Cheerful facial expression)                                   |                         |
|                                                                  | Prabhoota tila (Excessive Black moles)                       | Prasanna varna (Healthy complexion)                                            |                         |
|                                                                  | Prabhoota pidaka (manyacne/pimples/boils)                    | Saara shareera (Well nourished body)                                           |                         |
|                                                                  |                                                              | Samhata shareera (Compactness of body)                                         |                         |
|                                                                  |                                                              | Sthira shareera (Firmness of body)                                             |                         |
| <i>Sparsana</i> (tactile features)                               |                                                              |                                                                                |                         |
| Rooksha & Sushka (Dry/very dry)                                  | Mridu mamsa (Soft muscles)                                   | Snigdhangha (oily skin)                                                        |                         |
|                                                                  | Shithila mamsa (Lax muscles)                                 | Slakshananga (Smooth skin)                                                     |                         |
|                                                                  |                                                              | Alpa santapa (Cool skin)                                                       |                         |
| <i>Swara Pareeksha</i> (voice assessment)                        |                                                              |                                                                                |                         |
| Pratata rooksha swara (Dry Voice)                                |                                                              | Prasanna swara (Pleasant voice)                                                |                         |
| Pratata kshama swara (Low Voice)                                 |                                                              | Snigdha swara (Softness in voice)                                              |                         |
| Pratata sanna swara (Broken Voice)                               |                                                              |                                                                                |                         |
| Pratata sakta swara (Obstructed Voice)                           |                                                              |                                                                                |                         |
| Pratata jarjara swara (Hoarse Voice)                             |                                                              |                                                                                |                         |
| <i>Jagaruka</i> (sleep patterns)                                 |                                                              |                                                                                |                         |
| Very alert (very light sleeper)                                  | Frequently alert (Moderately deep sleeper)                   | Less alert (very deep sleeper)                                                 |                         |
| <i>Chesta &amp; Gati</i> (movements and gait)                    |                                                              |                                                                                |                         |
| Laghu chesta (Quick, light movements)                            |                                                              | Manda chesta (Slow movements)                                                  |                         |
| Chapala chesta (Hurried movements)                               |                                                              | Saara gati (measured movements)                                                |                         |
| Laghu gati (Quick, light Gait)                                   |                                                              | Avasthita gati (Stable Gait)                                                   |                         |
| Chapala gati (Hurried Gait)                                      |                                                              | Adhistita gati (Firm step -entire sole of the feet pressing against the earth) |                         |
| <i>Aahara &amp; Vyahara</i> (diet and lifestyle)                 |                                                              |                                                                                |                         |
| Laghu aahara (Poor eater)                                        | Prabhoota aahara (voracious eater)                           | Manda aahara (Slow eater)                                                      |                         |
| Chapala aahara (Inconsistent intake/appetite)                    | Pipasatva (Excessive Thirst)                                 | Alpa trushna (Less Thirst)                                                     |                         |
| Laghu vyahara (Quick, light Movements)                           | Prabhoota pana (High fluid intake)                           | Alpa kshut (Poor appetite)                                                     |                         |
| Chapala vyahara (Hurried Movements)                              | Kshudhavan ((Strong appetite)                                | Madhura priya (sweet tooth)                                                    |                         |
|                                                                  | Teekshnagni (Strong Digestive power)                         | Manda vyahara (Slow movements)                                                 |                         |
|                                                                  | Dandashooka (Gluttonous)                                     |                                                                                |                         |
| <i>Mala</i> (excretory products)                                 |                                                              |                                                                                |                         |
|                                                                  | Ati sweda (Profuse sweating)                                 | Alpa sweda (Minimal Sweating)                                                  |                         |
|                                                                  | Ati mootra (Excessive micturation)                           |                                                                                |                         |
| <i>Naadi Pareeksha</i> (Ayurvedic assessment of radial pulse)    |                                                              |                                                                                |                         |
| <i>Sparsha Sthana</i> (location)                                 |                                                              |                                                                                |                         |
| <i>Vata</i> nadi-Aadou vahate-nearest to base of thumb           | <i>Pitta</i> nadi-Madhye vahate-next to vatanadi             | <i>Kapha</i> nadi-Ante vahate-farthest from base of thumb                      |                         |
| <i>Naadi gati</i> (pulse wave-feel of)                           |                                                              |                                                                                |                         |
| Vakra gati (inconsistent)                                        | Kutilla gati (curved)                                        | Manda gati (soft)                                                              |                         |
| Sarpa gati (snakelike-wave moves side-to-side)                   | Bheka gati (froglike-wave in form of a curve)                | Raajahamsa/Mayura gati (swan/peacock like-low regular measured wave)           |                         |
| <b>Vata Pitta Nadi</b>                                           | <b>Vata Kaphaja Nadi</b>                                     | <b>Pitta Kaphaja Nadi</b>                                                      | <b>Tridoshaj Nadi</b>   |
| Vakram Uthplutya- Chalati                                        | Vakram Mandam                                                | Sukshma Sheeta-Sthira                                                          | Tridosha Lakshana-Yukta |
| Ishat Chapala Ca -Kathina                                        | Sthula Chanchala -Manda                                      |                                                                                |                         |

Contd

## Supplementary file 1 Contd....

| <i>Vata</i>                                                       | <i>Pitta</i>                                                                                  | <i>Kapha</i>                                                                           |
|-------------------------------------------------------------------|-----------------------------------------------------------------------------------------------|----------------------------------------------------------------------------------------|
| <i>Sandhi</i> (joints)                                            |                                                                                               |                                                                                        |
| Anavasthita sandhi (poor stability of joints)                     | Mridu sandhi (Soft joints)                                                                    | Sushlistha sandhi bandhana (Firmn, strong joints)                                      |
| Satata sandhi shabda gamina (Crackling on movment)                | Shithila sandhi (Loose- jointed)                                                              | Saara sandhi (Compact joints)                                                          |
| <i>Akshi</i> (Eyes)                                               |                                                                                               |                                                                                        |
| Anavasthita akshi (Restless Eyes)                                 |                                                                                               | Shuklaksha (White Eyes-sclera)                                                         |
| Anavasthita bhru (Restless Eye Brows)                             |                                                                                               | Raktanta netra (Reddish angles of Eyes)                                                |
| Anavasthita hanu-ostha-jihwa (Restless Jaws- Lips- Tongue)        |                                                                                               |                                                                                        |
| Anavasthita shira-skandha (Restless Head- Shoulder)               |                                                                                               |                                                                                        |
| Anavasthita pani (Restless Hands)                                 |                                                                                               |                                                                                        |
| Anavasthita pada (Restless Legs)                                  |                                                                                               |                                                                                        |
| <i>Manasika Lakshana</i>                                          |                                                                                               |                                                                                        |
| Bahu pralapa (Talkative)                                          | Vigrahya vakta (Hostile debator)                                                              | Asheegra kshoba (Low irritability)                                                     |
| Sheegra kshoba (Highly Irritable)                                 | Kshipra kopa – prasada (Quick temper-recovery)                                                | Alpa krodha (Slow temper)                                                              |
| Sheegra trasa (Poor stress tolerance)                             | Madhya jnana (Moderate Spiritual knowledge)                                                   | Shantha (Calm)                                                                         |
| Sheegra raga (Quick to like)                                      | Madhya vijnana (Moderate Materialistic knowledge)                                             | Chira grahi (Slow to comprehend)                                                       |
| Sheegra viraga (Quick to Dislike)                                 | Ushna asahishnu (Intolerance for hot)                                                         | Vidyavanta (Excellent Knowledge)                                                       |
| Shrutha grahi (Understands what is heard)                         | Teekshna parakrama (Very aggressive)                                                          | Dhratiman (Patience)                                                                   |
| Alpa smruthi (Forgets quickly)                                    | Klesha asahishnu (Low stress tolerance)                                                       | Asheegra arambha (Slow intiative)                                                      |
| Sheeta asahishnu (Intolerance for cold)                           |                                                                                               | Asheegra vikara (Slow onset of diseases)                                               |
| Sheegra samarambha (Quick initiative)                             |                                                                                               | Ojasvina (Optimum Resistance)                                                          |
| Sheegra vikara (Quick onset of diseases)                          |                                                                                               | Klesha kshama (High Stress Tolerance)                                                  |
|                                                                   |                                                                                               | Dhrida vaira (Determined adversary)                                                    |
| <i>Nakha</i> (nails)                                              |                                                                                               |                                                                                        |
| Parusha nakha (Rough nails)                                       | Tamra nakha (Coppery Nails)                                                                   |                                                                                        |
| <i>Dashana</i> (teeth)                                            |                                                                                               |                                                                                        |
| Parusha dashana (Rough teeth)                                     |                                                                                               |                                                                                        |
| <i>Vadana</i> (mouth)                                             |                                                                                               |                                                                                        |
| Parusha vadana (Rough mouth)                                      | Ushna vadana (warm mouth)                                                                     |                                                                                        |
|                                                                   | Asya gandha (Bad breath -halitosis)                                                           |                                                                                        |
| <i>Pani &amp; Pada</i> (palm and sole)                            |                                                                                               |                                                                                        |
| Parusha pani, paada (Rough palm & sole)                           | Tamra pani (Coppery Palms)                                                                    |                                                                                        |
|                                                                   | Tamra pada (Coppery Soles)                                                                    |                                                                                        |
| <i>Kesha, Loma, Shmashru</i> (Head-body-facial hair respectively) |                                                                                               |                                                                                        |
| Parusha kesha (Rough hair)                                        | Kshipra palita (Early greying)                                                                | Sthira kesha (Firm Hairs)                                                              |
| Parusha loma (Rough body hair)                                    | Kshipra khalitya (Early Balding)                                                              | Kutilla kesha (Curly Hairs)                                                            |
| Parusha shmashru (Rough facial hair)                              | Mridu kesha (Soft hair)                                                                       | Neela kesha (Blue Black Hairs)                                                         |
|                                                                   | Alpa kesha (Less hair)                                                                        | Jalada - Mridanga - Simha gosha (Voice resembles roaring of clouds, Mrindanga or Lion) |
|                                                                   | Kapila kesha (Brown hair)                                                                     |                                                                                        |
|                                                                   | Mridu loma (Soft body hairs)                                                                  |                                                                                        |
|                                                                   | Alpa loma (Less body hairs)                                                                   |                                                                                        |
|                                                                   | Kapila loma (Brown body hair)                                                                 |                                                                                        |
|                                                                   | Mridu shmashru (Soft facial hair)                                                             |                                                                                        |
|                                                                   | Alpa shmashru (Less facial hairs)                                                             |                                                                                        |
|                                                                   | Kapila shmashru (Brown facial hair)                                                           |                                                                                        |
|                                                                   | Prabhoota puti kaksha, shira, shareera gandha (Foul odour of axilla, head and body in excess) |                                                                                        |
| <i>Bala</i>                                                       |                                                                                               |                                                                                        |
| Alpa (less strength)                                              | Madhyama (moderate strength)                                                                  | Balavan (excellent strength)                                                           |
