# Supplementary material for: Determinants of Prakriti, the Human Constitution Types of Indian Traditional Medicine and its Correlation with Contemporary Science
Source: PubMed Central journal article supplement — J Ayurveda Integr Med. 2014 Jul-Sep;5(3):167–75. doi: 10.4103/0975-9476.140478 (PMC4204287; doi:10.4103/0975-9476.140478), 2014
Supplement: JAIM-5-167_S2.pdf [file JAIM-5-167_S2.pdf]

## SUPPLEMENTARY FILE 2

### Questionnaire for prakriti determination by ayurvedic physician

Personal information:

Name: \_\_\_\_\_  
Gender : \_\_\_\_\_  
Date of Birth : \_\_\_\_\_ Age: \_\_\_\_\_  
Father's Full Name : \_\_\_\_\_  
Mother's Full Name : \_\_\_\_\_  
Place of Birth : \_\_\_\_\_  
Address : \_\_\_\_\_  
Present : \_\_\_\_\_  
Permanent : \_\_\_\_\_  
Marital Status : \_\_\_\_\_  
Religion : \_\_\_\_\_  
Cast : \_\_\_\_\_  
Sub-caste : \_\_\_\_\_  
Height : \_\_\_\_\_  
Weight : \_\_\_\_\_  
Blood Group : \_\_\_\_\_  
Educational Qualification : \_\_\_\_\_  
Socio-Economic Status : \_\_\_\_\_  
Contact Number : \_\_\_\_\_  
Email ID : \_\_\_\_\_  
Personal History  
Food Habits : \_\_\_\_\_  
Micturition : \_\_\_\_\_  
Bowel Habits : \_\_\_\_\_  
Sleep : \_\_\_\_\_  
Occupation : \_\_\_\_\_  
Previous History of Illness: No/Yes  
If Yes, What was the nature of Illness?  
Age at which the Illness was suffered : \_\_\_\_\_  
Duration of suffering : \_\_\_\_\_  
Medical Consultation undertaken : \_\_\_\_\_  
Aftermath of Illness : \_\_\_\_\_  
Family History : \_\_\_\_\_  
Number of persons in the family : \_\_\_\_\_  
Family History of disease: \_\_\_\_\_  
Consanguinity : \_\_\_\_\_

A: DARSANA (Visual Observation)

1. Build : \_\_\_\_\_  
Body Frame-Small: \_\_\_\_\_  
Medium : \_\_\_\_\_  
Large : \_\_\_\_\_  
Obese : \_\_\_\_\_  
Head Circumference (inch): \_\_\_\_\_  
Chest Circumference (inch): \_\_\_\_\_  
Neck Circumference (inch): \_\_\_\_\_  
Neck Length (inch) : \_\_\_\_\_  
Upper Body Length (inch): \_\_\_\_\_

Lower Body Length (inch): \_\_\_\_\_  
Waist (inch) : \_\_\_\_\_  
Hip (inch) : \_\_\_\_\_  
Waist: Hip ratio: \_\_\_\_\_  
Forearm (inch): \_\_\_\_\_  
B.M.I : \_\_\_\_\_  
2. Joints : \_\_\_\_\_  
Weakly Developed : \_\_\_\_\_  
Moderately developed : \_\_\_\_\_  
Well developed : \_\_\_\_\_  
3. Eyes : \_\_\_\_\_  
Size : \_\_\_\_\_  
Small : \_\_\_\_\_  
Medium: \_\_\_\_\_  
Large : \_\_\_\_\_  
Appearance- Dry : \_\_\_\_\_  
Lustrous : \_\_\_\_\_  
Moist : \_\_\_\_\_  
Iris Color- Black : \_\_\_\_\_  
Light Brown : \_\_\_\_\_  
Dark Brown : \_\_\_\_\_  
Greyish/Blue/Green: \_\_\_\_\_  
Sclera- Muddy : \_\_\_\_\_  
Reddish Tinge : \_\_\_\_\_  
White : \_\_\_\_\_  
Eye brows- Small : \_\_\_\_\_  
Medium : \_\_\_\_\_  
Large : \_\_\_\_\_  
Eyes lashes- Small : \_\_\_\_\_  
Medium : \_\_\_\_\_  
Large : \_\_\_\_\_  
4. Teeth : \_\_\_\_\_  
Size- Small : \_\_\_\_\_  
Medium : \_\_\_\_\_  
Large : \_\_\_\_\_  
Shape- Regular : \_\_\_\_\_  
Irregular : \_\_\_\_\_  
Colour- MilkyWhite : \_\_\_\_\_  
Yellowish : \_\_\_\_\_  
Dull : \_\_\_\_\_  
5. Nails : \_\_\_\_\_  
Dry, small, rough, blackish, cracked : \_\_\_\_\_  
Soft smooth, pink luster : \_\_\_\_\_  
Big,convex, pink white : \_\_\_\_\_  
6. Skin : \_\_\_\_\_  
Complexion- Brown or Blackish: \_\_\_\_\_  
Pale, yellowish : \_\_\_\_\_  
Fair and lustrous: \_\_\_\_\_  
Hair- Scanty and hard : \_\_\_\_\_  
Scanty and oily : \_\_\_\_\_  
Thick and oily : \_\_\_\_\_  
Scalp Hair- Colour : \_\_\_\_\_  
Black, Dark Brown:

Blonde :  
 Dusky :  
 Tongue- Dry :  
 Red :  
 Wet and Shining :  
 Voice- Hoarse and Rough :  
 Crackle :  
 Heavy :

Weather- Preferred- Cold :  
 Warm :  
 Humid :  
 Dry :  
 - Not Preferred- Cold :  
 Warm :  
 Humid :  
 Dry :

B: SPARSHANA (Tactile Observation)

Pulse Diagnosis- Radial Pulse :  
 Snake Pulse :  
 Frog Pulse :  
 Skin- Swan Pulse :  
 Dry :  
 Soft :  
 Soft and Oily :

Temperament- Nervous :  
 Angry and Irritable:  
 Sleep- Easy going :  
 Less and Disturbed :  
 Moderate :  
 Heavy :  
 Memory- Good grasp but forget  
 easily :  
 Sharp :  
 Slow but do not  
 forget :

C: Prashana (Questions)

Food /Liquid Intake- Frequency :  
 Regular/Irregular  
 Amount : Less/Moderate/High  
 Bowel Movements :  
 Regular/Irregular/Variable  
 Stool Consistency- Loose/Soft /Semi-solid :  
 Medium:  
 Hard :  
 Food Inclinations- Sweet :  
 Sour :  
 Bitter :  
 Astringent :  
 Pungent :  
 Salty :

| Dosha | Number of characters present | Percentage of characters present |
|-------|------------------------------|----------------------------------|
| Vaata |                              |                                  |
| Pitta |                              |                                  |
| Kapha |                              |                                  |

Prakriti Type

Signature of the Physician

With Date
