# Supplementary material for: Determinants of Prakriti, the Human Constitution Types of Indian Traditional Medicine and its Correlation with Contemporary Science
Source: PubMed Central journal article supplement — J Ayurveda Integr Med. 2014 Jul-Sep;5(3):167–75. doi: 10.4103/0975-9476.140478 (PMC4204287; doi:10.4103/0975-9476.140478), 2014
Supplement: JAIM-5-167_S5.pdf [file JAIM-5-167_S5.pdf]

## SUPPLEMENTARY FILE 5

**Table S2: Impact of geographical region (desa) on prakriti**

| Desha-dominant dosha         | Properties/features                                                                                                     | Mahabhoota       |
|------------------------------|-------------------------------------------------------------------------------------------------------------------------|------------------|
| <i>Anoopa-kapha</i>          | Abundant water reserves, extensive river networks, heavy rainfall, soft cool breezes, heavily wooded mountainous ranges | Jala             |
| <i>Jaangala-vata</i>         | Wide open plains, sparse thorny vegetation, minimal rainfall, strong hot breezes                                        | Vayu             |
| <i>Sadharana-vata, kapha</i> | Optimum cold, rain, hot phases                                                                                          | Vayu, tejas jala |
